# Supplementary material for: Metal-catalyzed stereoselective ring-opening polymerization of functional β-lactones: methylene-alkoxy-fluorinated polyhydroxyalkanoates unveil the role of non-covalent interactions
Source: Royal Society of Chemistry journal article supplement (doi:10.1039/d3py01430d), 2024-01-01
Supplement: d3py01430d1.pdf [file d3py01430d1.pdf]

## Supporting Information

### **Metal-Catalyzed Stereoselective Ring-Opening Polymerization of Functional $\beta$ -Lactones: Methylene-Alkoxy Fluorinated Polyhydroxyalkanoates Unveil the Role of Non-Covalent Interactions**

Ali Dhaini,<sup>a</sup> Rama M. Shakaroun,<sup>a</sup> Ali Alaaeddine,<sup>b</sup> Jean-François Carpentier (ORCID: 0000-0002-9160-7662),<sup>a,\*</sup> and Sophie M. Guillaume (ORCID: 0000-0003-2917-8657)<sup>a,\*</sup>

<sup>a</sup> Univ. Rennes, CNRS, Institut des Sciences Chimiques de Rennes, UMR 6226, F-35042 Rennes, France.

<sup>b</sup> Univ. Libanaise, Campus Universitaire Rafic Hariri Hadath, Faculté des Sciences, Laboratoire de Chimie Médicinale et des Produits Naturels, Beirut, Lebanon

E-mail: [sophie.guillaume@univ-rennes1.fr](mailto:sophie.guillaume@univ-rennes1.fr), [jean-francois.carpentier@univ-rennes1.fr](mailto:jean-francois.carpentier@univ-rennes1.fr)

## Table of contents

### Synthesis of enantiopure (S)-G<sup>CH<sub>2</sub>OCF<sub>2</sub>CHF<sub>2</sub></sup>

**Scheme S1.** Isolation of enantio-enriched (S)-G<sup>CH<sub>2</sub>OCF<sub>2</sub>CHF<sub>2</sub></sup> by hydrolytic kinetic resolution (HKR) of *rac*-G<sup>CH<sub>2</sub>OCF<sub>2</sub>CHF<sub>2</sub></sup>.

**Figure S1.** Separation of enantiomers of G<sup>CH<sub>2</sub>OCF<sub>2</sub>CHF<sub>2</sub></sup> (left, a racemic mixture; right, the product isolated from hydrolytic kinetic resolution) using chiral gas chromatography.

**Figure S2.** <sup>1</sup>H NMR spectrum (400 MHz, CDCl<sub>3</sub>, 25 °C) of *racemic* 2-((1,1,2,2-tetrafluoroethoxy)methyl)oxirane (*rac*-G<sup>CH<sub>2</sub>OCF<sub>2</sub>CHF<sub>2</sub></sup>).

**Figure S3.** <sup>13</sup>C J-MOD NMR spectrum (100 MHz, (CD<sub>3</sub>)<sub>2</sub>CO, 25 °C) of *racemic* 2-((1,1,2,2-tetrafluoroethoxy)methyl)oxirane (*rac*-G<sup>CH<sub>2</sub>OCF<sub>2</sub>CHF<sub>2</sub></sup>).

**Figure S4.** <sup>19</sup>F NMR spectrum (376 MHz, (CD<sub>3</sub>)<sub>2</sub>CO, 25 °C) of *racemic* 2-((1,1,2,2-tetrafluoroethoxy)methyl)oxirane (*rac*-G<sup>CH<sub>2</sub>OCF<sub>2</sub>CHF<sub>2</sub></sup>).

**Figure S5.** <sup>1</sup>H NMR spectrum (500 MHz, (CD<sub>3</sub>)<sub>2</sub>CO, 25 °C) of *racemic* 4-((1,1,2,2-tetrafluoroethoxy)methyl)oxetan-2-one (*rac*-BPL<sup>CH<sub>2</sub>OCF<sub>2</sub>CHF<sub>2</sub></sup>).

**Figure S6.** <sup>13</sup>C J-MOD NMR spectrum (125 MHz, (CD<sub>3</sub>)<sub>2</sub>CO, 25 °C) of *racemic* 4-((1,1,2,2-tetrafluoroethoxy)methyl)oxetan-2-one (*rac*-BPL<sup>CH<sub>2</sub>OCF<sub>2</sub>CHF<sub>2</sub></sup>).

**Figure S7.** <sup>19</sup>F NMR spectrum (470 MHz, (CD<sub>3</sub>)<sub>2</sub>CO, 25 °C) of *racemic* 4-((1,1,2,2-tetrafluoroethoxy)methyl)oxetan-2-one (*rac*-BPL<sup>CH<sub>2</sub>OCF<sub>2</sub>CHF<sub>2</sub></sup>).

**Figure S8.** <sup>1</sup>H-<sup>1</sup>H COSY NMR spectrum (500 MHz, (CD<sub>3</sub>)<sub>2</sub>CO, 25 °C) of a PBPL<sup>CH<sub>2</sub>OCF<sub>2</sub>CHF<sub>2</sub></sup> polymer prepared from the ROP of *rac*-BPL<sup>CH<sub>2</sub>OCF<sub>2</sub>CHF<sub>2</sub></sup> mediated by the **1c**/*i*PrOH (1:1) catalyst system (Table 1, entry 10). \* stands for resonances of residual solvent and/or catalyst.

**Figure S9.** <sup>1</sup>H-<sup>13</sup>C HSQC NMR spectrum (500 MHz, (CD<sub>3</sub>)<sub>2</sub>CO, 25 °C) of a PBPL<sup>CH<sub>2</sub>OCF<sub>2</sub>CHF<sub>2</sub></sup> polymer prepared from the ROP of *rac*-BPL<sup>CH<sub>2</sub>OCF<sub>2</sub>CHF<sub>2</sub></sup> mediated by the **1c**/*i*PrOH (1:1) catalyst system (Table 1, entry 10). \* stands for resonances of residual solvent and/or catalyst.

**Figure S10.** DOSY NMR modulated spectrum of a PBPL<sup>CH<sub>2</sub>OCF<sub>2</sub>CHF<sub>2</sub></sup> sample (the same as the one

studied by MALDI-ToF MS reported Figure 4) prepared from the ROP of *rac*-BPL<sup>CH<sub>2</sub>OCF<sub>2</sub>CHF<sub>2</sub></sup> using **1d**/*i*PrOH (Table 1, entry 17).

**Figure S11.** Zoomed regions of the <sup>13</sup>C J-MOD NMR spectra (100 MHz, (CD<sub>3</sub>)<sub>2</sub>CO, 23 °C) of PBPL<sup>CH<sub>2</sub>OCF<sub>2</sub>CHF<sub>2</sub></sup>s prepared by ROP of *rac*-BPL<sup>CH<sub>2</sub>OCF<sub>2</sub>CHF<sub>2</sub></sup>, except for the top spectrum of enantiopure (*S*)-BPL<sup>CH<sub>2</sub>OCF<sub>2</sub>CHF<sub>2</sub></sup> (Table 1, entry 2), mediated by the (BDI)Zn(NTMS<sub>2</sub>), **1a**, **1d**, **1c**, or **1b**/*i*PrOH (1 : 1) catalyst systems, respectively (Table 1, entries 2, 3, 5, 8 and 18).

**Figure S12.** Zoomed regions of the <sup>13</sup>C{<sup>1</sup>H} NMR spectrum (100 MHz, (CD<sub>3</sub>)<sub>2</sub>CO, 23 °C) of a PBPL<sup>CH<sub>2</sub>OCF<sub>2</sub>CHF<sub>2</sub></sup> polymer prepared by ROP of *rac*-BPL<sup>CH<sub>2</sub>OCF<sub>2</sub>CHF<sub>2</sub></sup> mediated by the **1b**/*i*PrOH (1 : 1) catalyst system (Table 1, entry 18).

**Figure S13.** <sup>13</sup>C{<sup>1</sup>H} NMR (100 MHz, (CD<sub>3</sub>)<sub>2</sub>CO, 25 °C) spectrum of a PBPL<sup>CH<sub>2</sub>OCF<sub>2</sub>CHF<sub>2</sub></sup> polymer prepared from the ROP of *rac*-BPL<sup>CH<sub>2</sub>OCF<sub>2</sub>CHF<sub>2</sub></sup> mediated by the **1b**/*i*PrOH (1:1) catalyst system (Table 1, entry 18).

**Figure S14.** SEC trace of an isolated PBPL<sup>CH<sub>2</sub>OCF<sub>2</sub>CHF<sub>2</sub></sup> prepared by ROP of *rac*-BPL<sup>CH<sub>2</sub>OCF<sub>2</sub>CHF<sub>2</sub></sup> prepared from **1c**/*i*PrOH (Table 1, entry 10). \* stands for residual ligand (≈ 600 g.mol<sup>-1</sup>).

**Figure S15.** SEC trace of an isolated PBPL<sup>CH<sub>2</sub>OCF<sub>2</sub>CHF<sub>2</sub></sup> prepared from **1d**/*i*PrOH (Table 1, entry 18). \* stands for residual ligand (≈ 600 g.mol<sup>-1</sup>).

**Figure S16.** SEC trace of an isolated PBPL<sup>CH<sub>2</sub>OCF<sub>2</sub>CHF<sub>2</sub></sup> prepared from **1d**/*i*PrOH (Table 1, entry 2). \* stands for residual ligand (≈ 600 g.mol<sup>-1</sup>).

**Figure S17.** DSC thermogram (heating rate = 10 °C min<sup>-1</sup>, second heating cycle –80 to +200 °C) of a syndio-enriched PBPL<sup>CH<sub>2</sub>OCF<sub>2</sub>CHF<sub>2</sub></sup> (*P<sub>r</sub>* = 0.79) prepared by ROP of *rac*-BPL<sup>CH<sub>2</sub>OCF<sub>2</sub>CHF<sub>2</sub></sup> with the **1c**/*i*PrOH system (Table 1, entry 15).

**Figure S18.** DSC thermogram (heating rate = 10 °C min<sup>-1</sup>, second heating cycle –80 to +200 °C) of a syndio-enriched PBPL<sup>CH<sub>2</sub>OCF<sub>2</sub>CHF<sub>2</sub></sup> (*P<sub>r</sub>* = 0.86) prepared by ROP of *rac*-BPL<sup>CH<sub>2</sub>OCF<sub>2</sub>CHF<sub>2</sub></sup> with the **1d**/*i*PrOH system (Table 1, entry 18).

**Figure S19.** DSC thermogram (heating rate = 10 °C min<sup>-1</sup>, second heating cycle –80 to +200 °C) of an iso-enriched PBPL<sup>CH<sub>2</sub>OCF<sub>2</sub>CHF<sub>2</sub></sup> polymer (*P<sub>r</sub>* = 0.09) prepared by ROP of (*S*)-BPL<sup>CH<sub>2</sub>OCF<sub>2</sub>CHF<sub>2</sub></sup> mediated by the **1d**/*i*PrOH system (Table 1, entry 2).

**Figure S20.** TGA thermogram of a PBPL<sup>CH<sub>2</sub>OCF<sub>2</sub>CHF<sub>2</sub></sup> prepared from the ROP of (*rac*)-BPL<sup>CH<sub>2</sub>OCF<sub>2</sub>CHF<sub>2</sub></sup> mediated by complex **1d** in the presence of *i*PrOH (Table 1, entry 5).  $T_d$  is the degradation temperature at 5wt% loss of the polymer.

**Figure S21.** TGA thermogram of a PBPL<sup>CH<sub>2</sub>OCF<sub>2</sub>CHF<sub>2</sub></sup> prepared from the ROP of (*S*)-BPL<sup>CH<sub>2</sub>OCF<sub>2</sub>CHF<sub>2</sub></sup> mediated by complex **1d** in the presence of *i*PrOH (Table 1, entry 2).  $T_d$  is the degradation temperature at 5wt% loss of the polymer.

**Figure S22.** TGA thermogram of a PBPL<sup>CH<sub>2</sub>OCF<sub>2</sub>CHF<sub>2</sub></sup> prepared from the ROP of (*rac*)-BPL<sup>CH<sub>2</sub>OCF<sub>2</sub>CHF<sub>2</sub></sup> mediated by complex **1d** in the presence of *i*PrOH (Table 1, entry 3).  $T_d$  is the degradation temperature at 5wt% loss of the polymer.

## Synthesis of enantio-enriched (*S*)-G<sup>CH<sub>2</sub>OCF<sub>2</sub>CHF<sub>2</sub></sup>

The synthesis of enantio-enriched (*S*)-G<sup>CH<sub>2</sub>OCF<sub>2</sub>CHF<sub>2</sub></sup> was performed through hydrolytic kinetic resolution (HKR) of the *racemic* epoxide.<sup>i</sup> performed using 5mol% of chiral (salen)Co<sup>III</sup> complex **1.OAc** (Jacobsen's catalyst ((*R,R*)-**1**)), in the presence of 2mol% acetic acid and 50wt% water (Scheme S1). The thus recovered (*S*)-G<sup>CH<sub>2</sub>OCF<sub>2</sub>CHF<sub>2</sub></sup> was separated from the diol co-product by distillation (1.6 g, 40%). It was then characterized by NMR and chiral chromatography; incomplete separation of the two enantiomers' peaks allowed us to assess only > 90% ee purity (Figure S1).

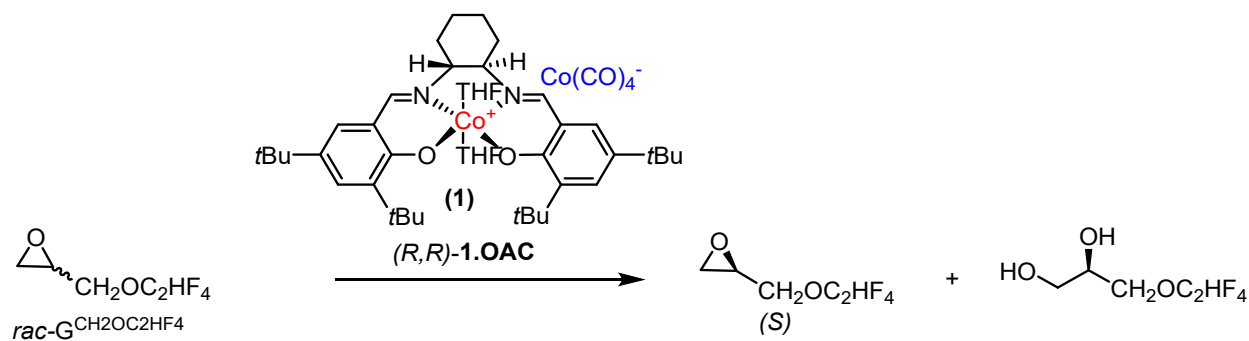

**Scheme S1.** Isolation of enantio-enriched (*S*)-G<sup>CH<sub>2</sub>OCF<sub>2</sub>CHF<sub>2</sub></sup> (> 90% ee) by hydrolytic kinetic resolution (HKR) of *rac*-G<sup>CH<sub>2</sub>OCF<sub>2</sub>CHF<sub>2</sub></sup>.

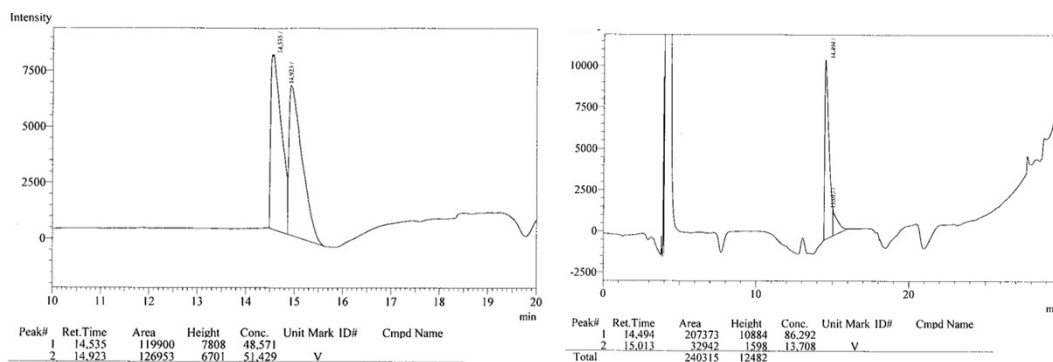

**Figure S1.** Separation of enantiomers of G<sup>CH<sub>2</sub>OCF<sub>2</sub>CHF<sub>2</sub></sup> (left: a racemic mixture; right: the product isolated from hydrolytic kinetic resolution) using chiral gas chromatography (performed on a CPG/FID VARIAN CP-3380 chromatograph equipped with a Chiralsil-Dex CB Varian CP7502 Chrompack).

<sup>ii</sup> Scott E. Schaus, Bridget D. Brandes, Jay F. Larrow, Makoto Tokunaga, Karl B. Hansen, Alexandra E. Gould, Michael E. Furrow, and Eric N. Jacobsen, *J. Am. Chem. Soc.* 2002, 124, 7, 1307–1315. Highly Selective Hydrolytic Kinetic Resolution of Terminal Epoxides Catalyzed by Chiral (salen)Co<sup>III</sup> Complexes. Practical Synthesis of Enantioenriched Terminal Epoxides and 1,2-Diols. <https://doi-org.passerelle.univ-rennes1.fr/10.1021/ja016737l>

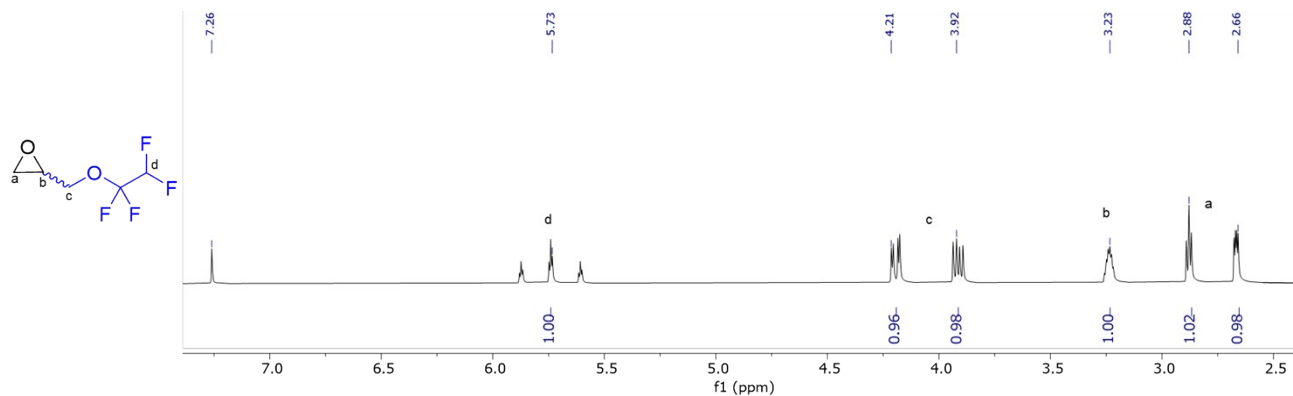

**Figure S2.**  $^1\text{H}$  NMR spectrum (400 MHz,  $\text{CDCl}_3$ , 25 °C) of *racemic* 2-((1,1,2,2-tetrafluoroethoxy)methyl)oxirane (*rac*- $\text{G}^{\text{CH}_2\text{OCF}_2\text{CHF}_2}$ ).

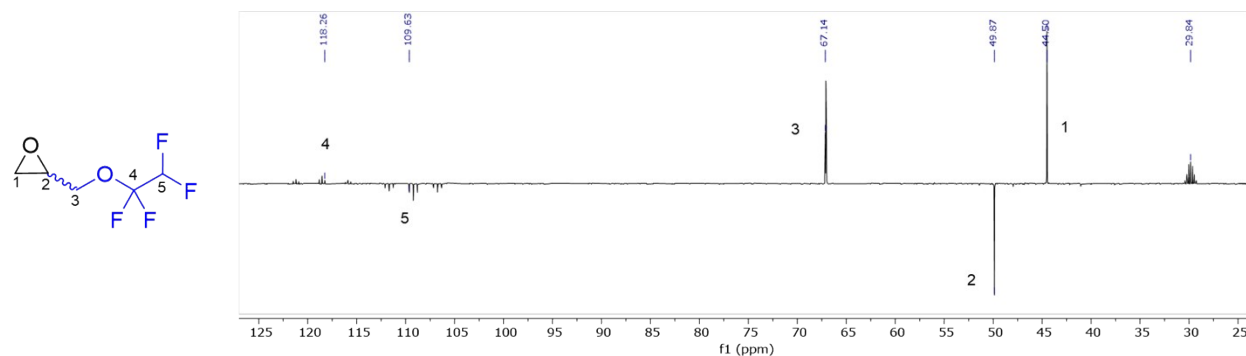

**Figure S3.**  $^{13}\text{C}$  J-MOD NMR spectrum (100 MHz,  $(\text{CD}_3)_2\text{CO}$ , 25 °C) of *racemic* 2-((1,1,2,2-tetrafluoroethoxy)methyl)oxirane (*rac*- $\text{G}^{\text{CH}_2\text{OCF}_2\text{CHF}_2}$ ).

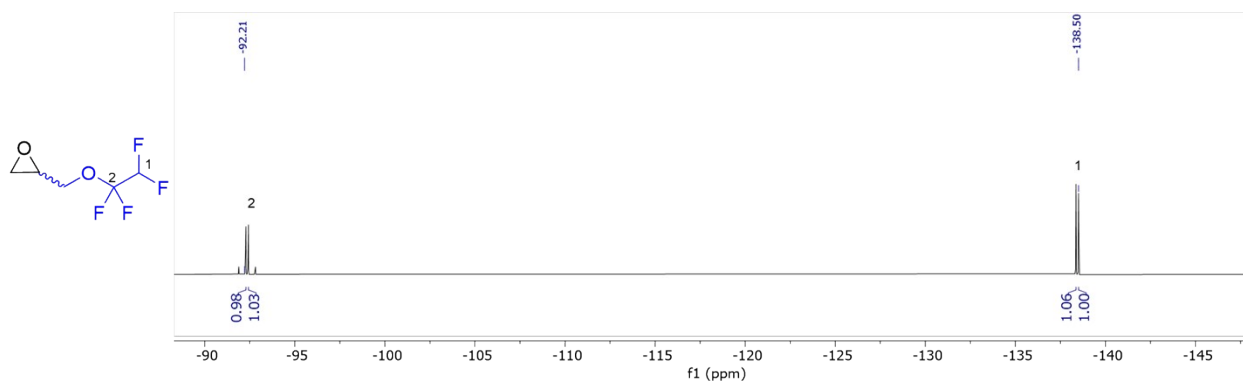

**Figure S4.**  $^{19}\text{F}$  NMR spectrum (376 MHz,  $(\text{CD}_3)_2\text{CO}$ , 25 °C) of *racemic* 2-((1,1,2,2-tetrafluoroethoxy)methyl)oxirane (*rac*- $\text{G}^{\text{CH}_2\text{OCF}_2\text{CHF}_2}$ ).

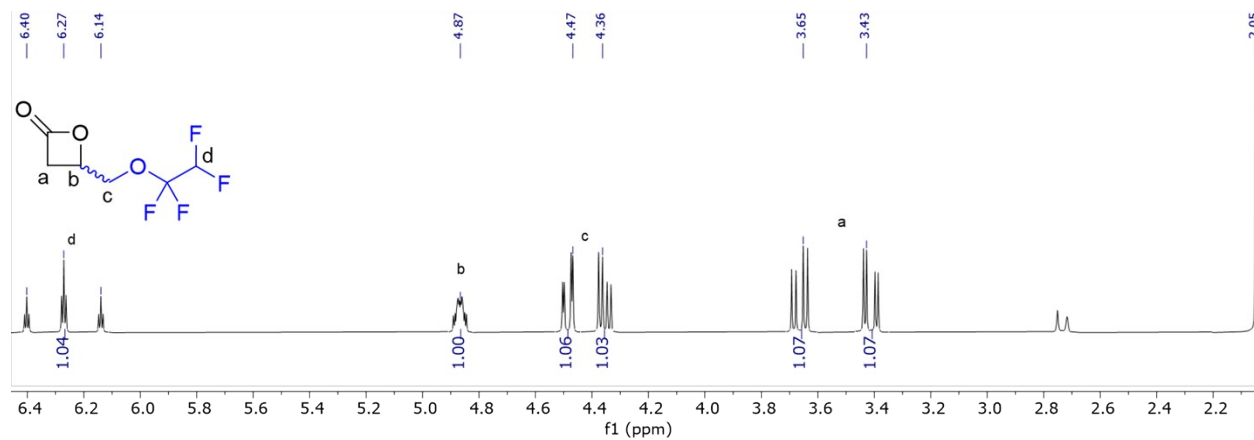

**Figure S5.** <sup>1</sup>H NMR spectrum (500 MHz, (CD<sub>3</sub>)<sub>2</sub>CO, 25 °C) of *racemic* 4-((1,1,2,2-tetrafluoroethoxy)methyl)oxetan-2-one (*rac*-BPL<sup>CH<sub>2</sub>O</sup>CF<sub>2</sub>CHF<sub>2</sub>).

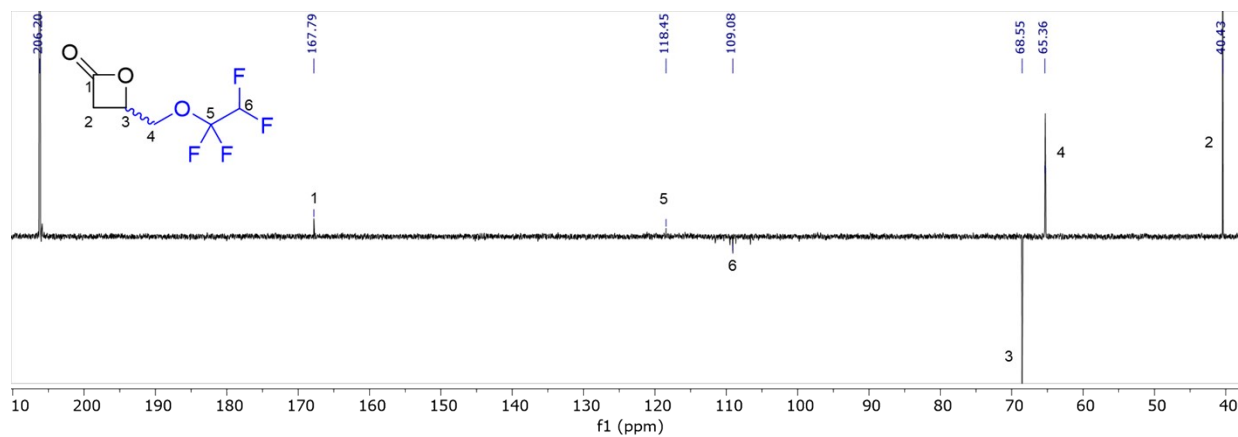

**Figure S6.** <sup>13</sup>C J-MOD NMR spectrum (125 MHz, (CD<sub>3</sub>)<sub>2</sub>CO, 25 °C) of *racemic* 4-((1,1,2,2-tetrafluoroethoxy)methyl)oxetan-2-one (*rac*-BPL<sup>CH<sub>2</sub>O</sup>CF<sub>2</sub>CHF<sub>2</sub>).

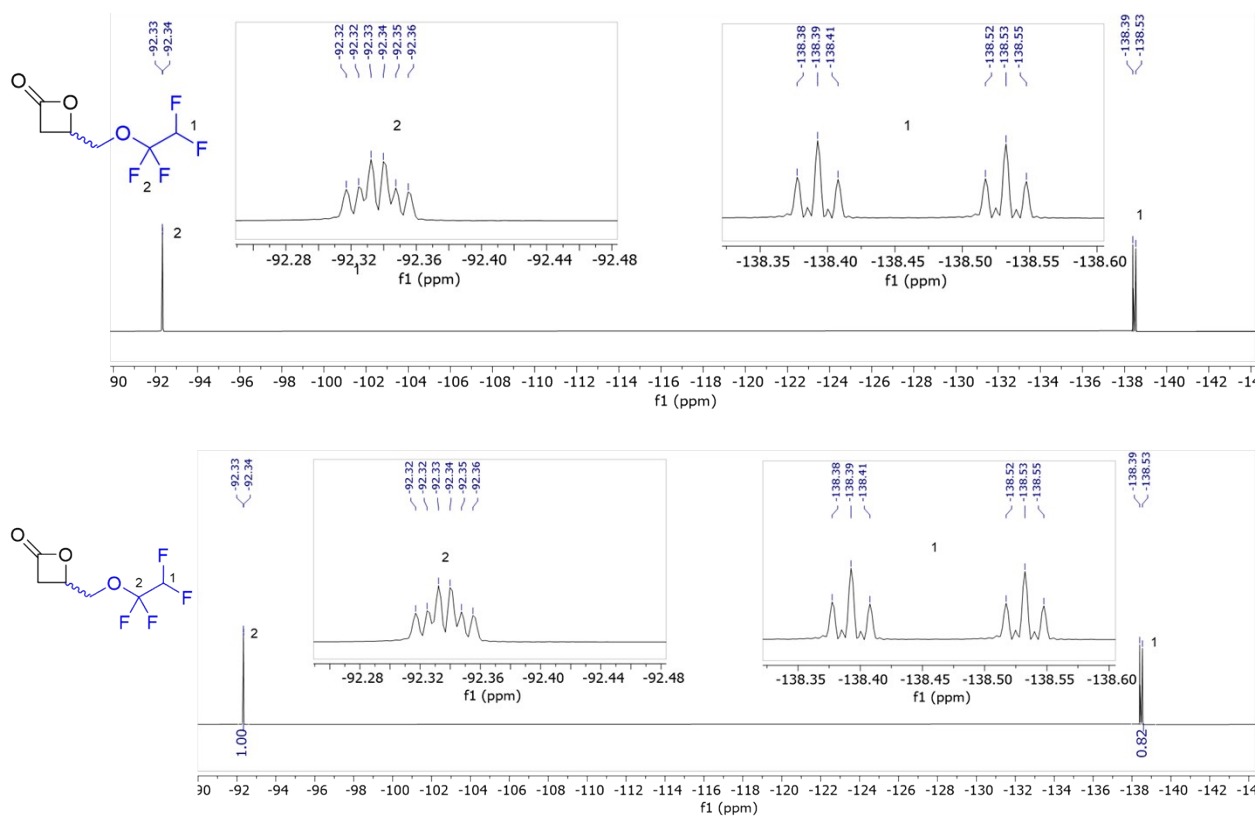

**Figure S7.**  $^{19}\text{F}$  NMR spectrum (470 MHz,  $(\text{CD}_3)_2\text{CO}$ , 25  $^\circ\text{C}$ ) of *racemic* 4-((1,1,2,2-tetrafluoroethoxy)methyl)oxetan-2-one (*rac*-BPL $^{\text{CH}_2\text{OCF}_2\text{CHF}_2}$ ).



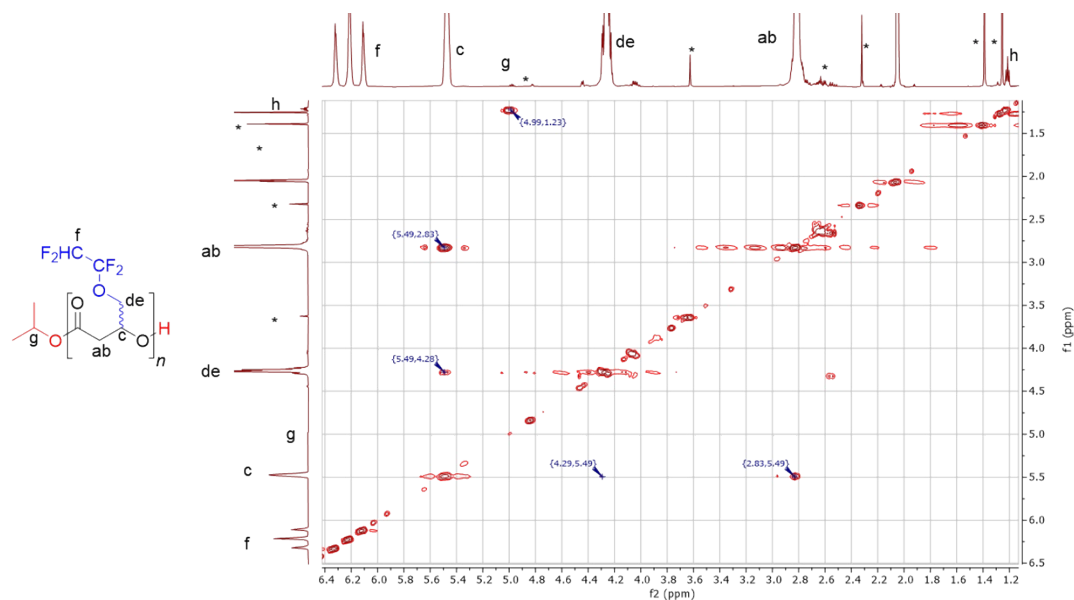

**Figure S8.**  $^1\text{H}$ - $^1\text{H}$  COSY NMR spectrum (500 MHz,  $(\text{CD}_3)_2\text{CO}$ , 25 °C) of a PBPL $^{\text{CH}_2\text{OCF}_2\text{CHF}_2}$  polymer prepared from the ROP of  $\text{rac-BPL}^{\text{CH}_2\text{OCF}_2\text{CHF}_2}$  mediated by the **1c**/*i*PrOH (1:1) catalyst system (Table 1, entry 10). \* stands for resonances of residual solvent and/or catalyst.

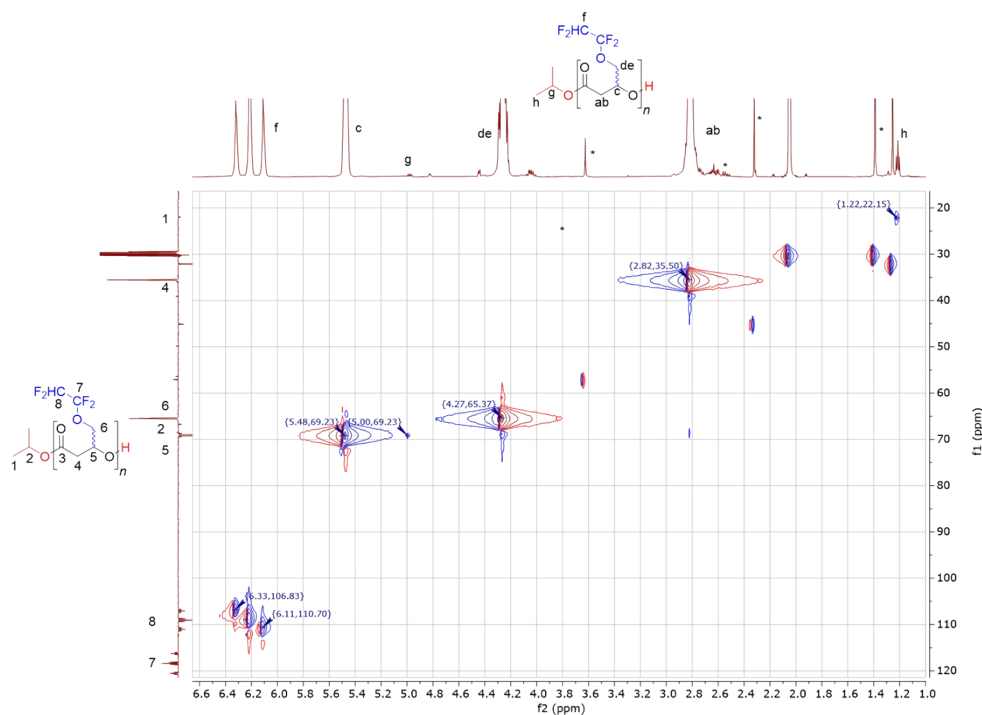

**Figure S9.**  $^1\text{H}$ - $^{13}\text{C}$  HSQC NMR spectrum (500 MHz,  $(\text{CD}_3)_2\text{CO}$ , 25 °C) of a PBPL $^{\text{CH}_2\text{OCF}_2\text{CHF}_2}$  polymer prepared from the ROP of  $\text{rac-BPL}^{\text{CH}_2\text{OCF}_2\text{CHF}_2}$  mediated by the **1c**/*i*PrOH (1:1) catalyst system (Table 1, entry 10). \* stands for resonances of residual solvent and/or catalyst.

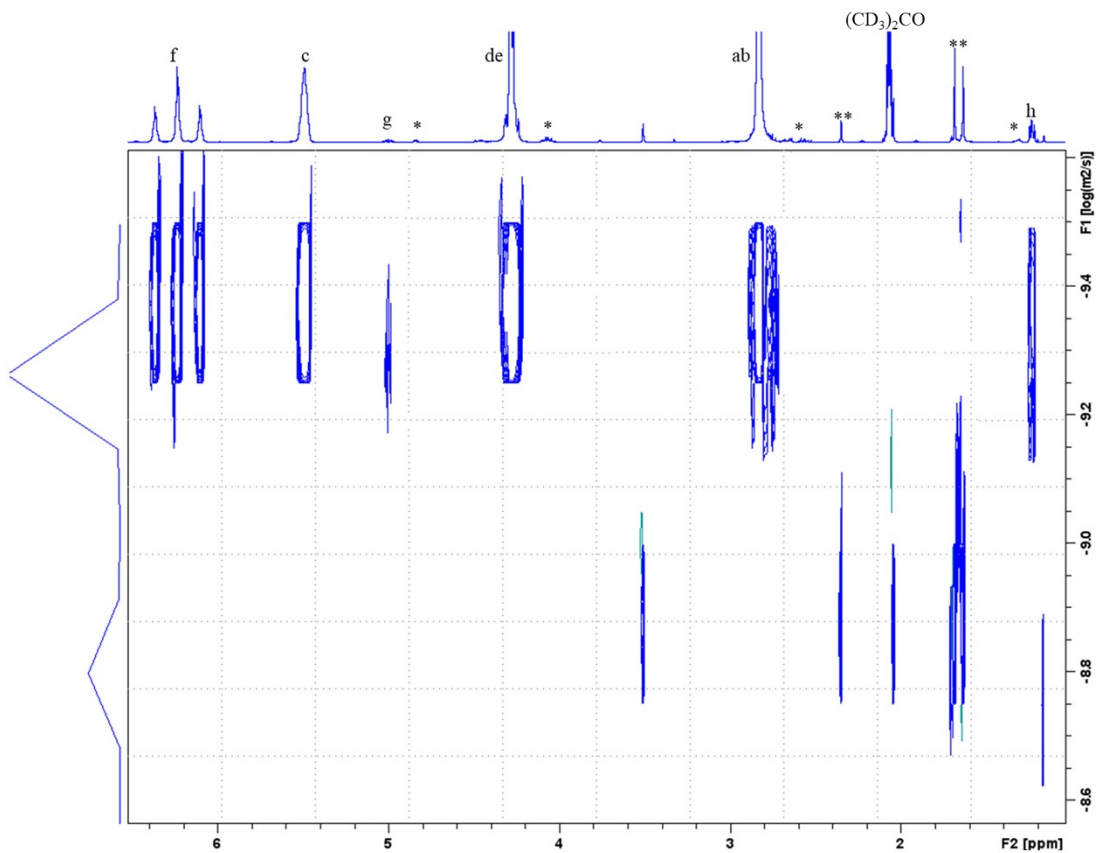

**Figure S10.** DOSY NMR modulated spectrum of a  $\text{PBPL}^{\text{CH}_2\text{OCF}_2\text{CHF}_2}$  sample (the same as the one studied by MALDI-ToF MS reported Figure 4) prepared from the ROP of  $\text{rac-BPL}^{\text{CH}_2\text{OCF}_2\text{CHF}_2}$  using **1d**/*i*PrOH (Table 1, entry 17).

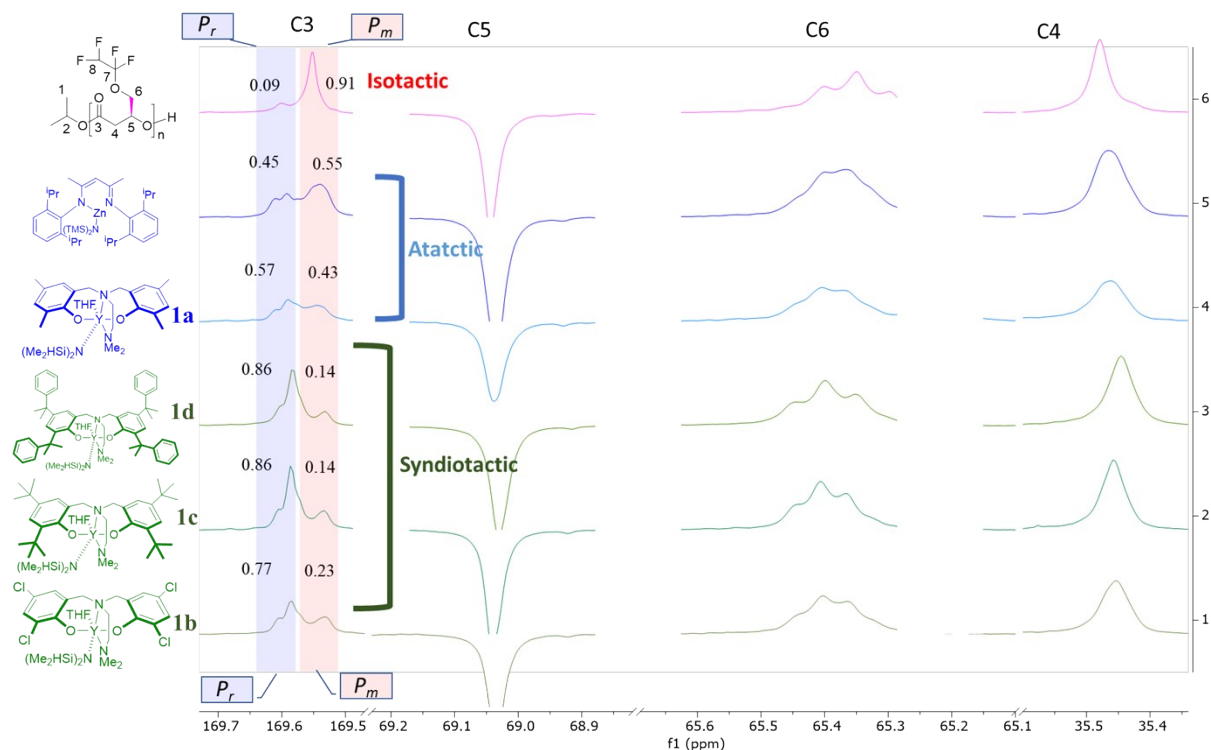

**Figure S11.** Zoomed regions of the  $^{13}\text{C}$  J-MOD NMR spectra (100 MHz,  $(\text{CD}_3)_2\text{CO}$ , 23 °C) of  $\text{PBPL}^{\text{CH}_2\text{OCF}_2\text{CHF}_2}_s$  prepared by ROP of  $\text{rac-BPL}^{\text{CH}_2\text{OCF}_2\text{CHF}_2}$ , except for the top spectrum of enantiopure (*S*)- $\text{BPL}^{\text{CH}_2\text{OCF}_2\text{CHF}_2}$  (Table 1, entry 2), mediated by the  $(\text{BDI})\text{Zn}(\text{NTMS}_2)$ , **1a**, **1d**, **1c**, or **1b**/*i*PrOH (1 : 1) catalyst systems, respectively (Table 1, entries 2, 3, 5, 8 and 18).

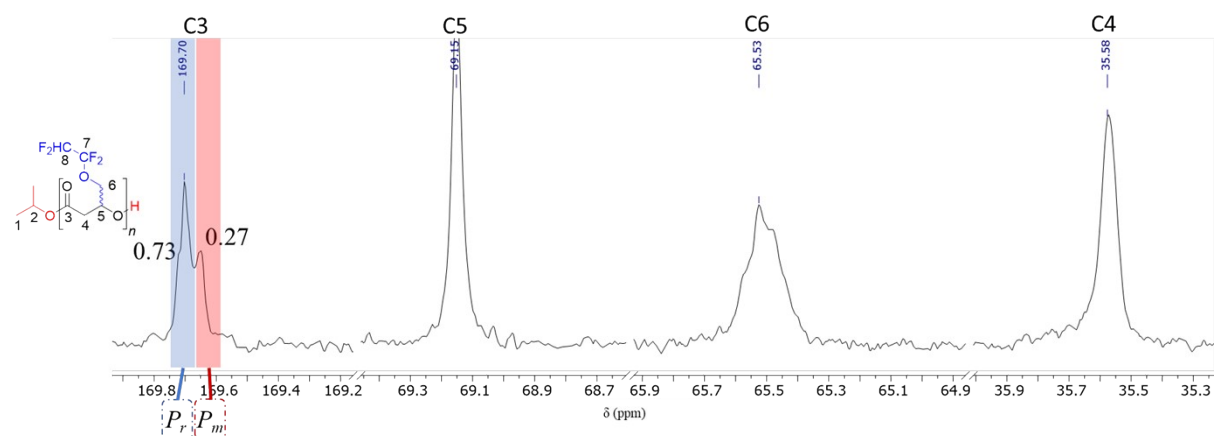

**Figure S12.** Zoomed regions of the  $^{13}\text{C}\{^1\text{H}\}$  NMR spectrum (100 MHz,  $(\text{CD}_3)_2\text{CO}$ , 23 °C) of a  $\text{PBPL}^{\text{CH}_2\text{OCF}_2\text{CHF}_2}$  polymer prepared by ROP of  $\text{rac-BPL}^{\text{CH}_2\text{OCF}_2\text{CHF}_2}$  mediated by the **1b**/*i*PrOH (1 : 1) catalyst system (Table 1, entry 18).

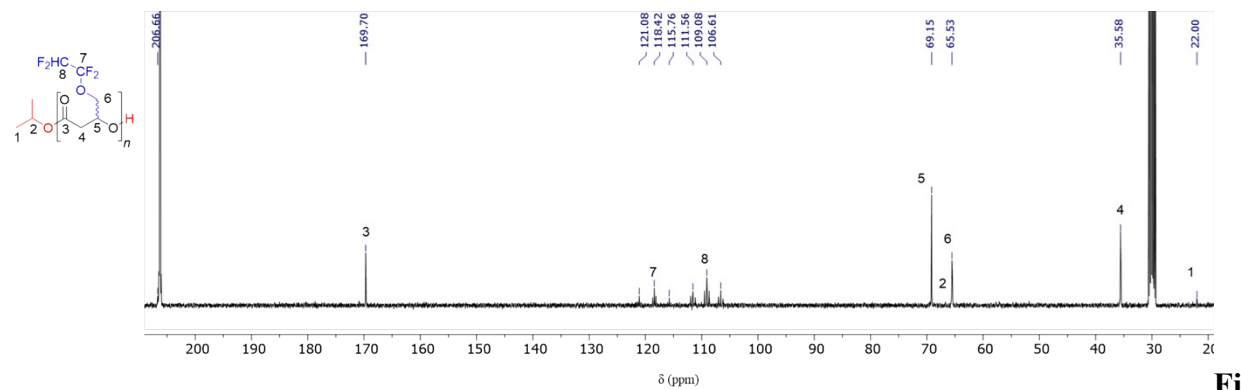

**Figure S13.**  $^{13}\text{C}\{^1\text{H}\}$  NMR (100 MHz,  $(\text{CD}_3)_2\text{CO}$ , 25 °C) spectrum of a  $\text{PBPL}^{\text{CH}_2\text{OCF}_2\text{CHF}_2}$  polymer prepared from the ROP of  $\text{rac-BPL}^{\text{CH}_2\text{OCF}_2\text{CHF}_2}$  mediated by the **1b**/*i*PrOH (1:1) catalyst system (Table 1, entry 18).

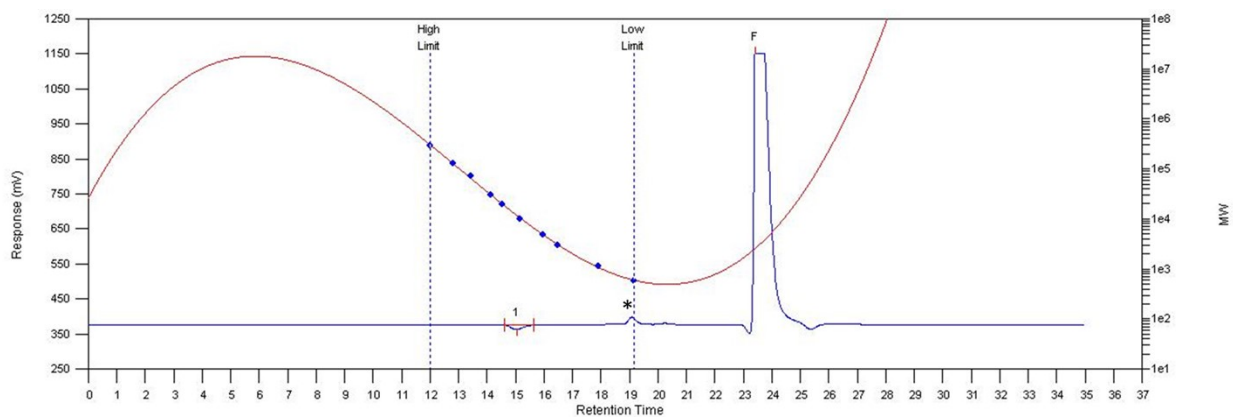

**Figure S14.** SEC trace of an isolated  $\text{PBPL}^{\text{CH}_2\text{OCF}_2\text{CHF}_2}$  prepared by ROP of  $\text{rac-BPL}^{\text{CH}_2\text{OCF}_2\text{CHF}_2}$  prepared from **1c**/*i*PrOH (Table 1, entry 10). \* stands for residual ligand ( $\approx 600 \text{ g}\cdot\text{mol}^{-1}$ ).

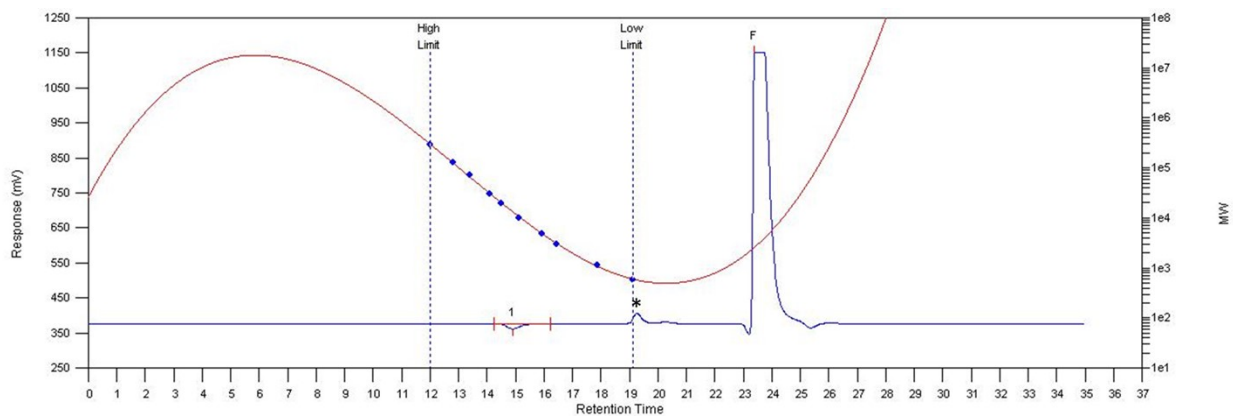

**Figure S15.** SEC trace of an isolated  $\text{PBPL}^{\text{CH}_2\text{OCF}_2\text{CHF}_2}$  prepared from **1d**/*i*PrOH (Table 1, entry 18). \* stands for residual ligand ( $\approx 600 \text{ g}\cdot\text{mol}^{-1}$ ).

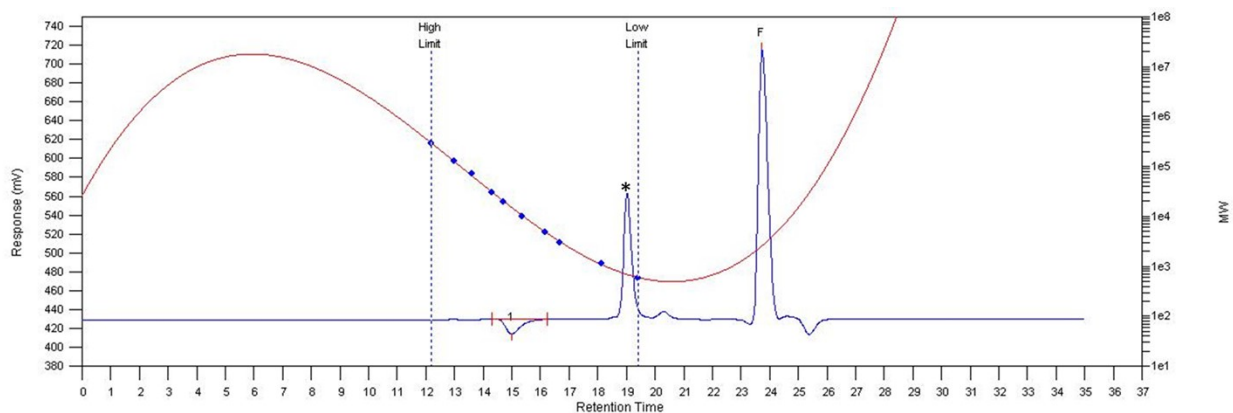

**Figure S16.** SEC trace of an isolated PBPL<sup>CH<sub>2</sub>OCF<sub>2</sub>CHF<sub>2</sub></sup> prepared from **1d**/*i*PrOH (Table 1, entry 2). \* stands for residual ligand ( $\approx 600 \text{ g}\cdot\text{mol}^{-1}$ ).

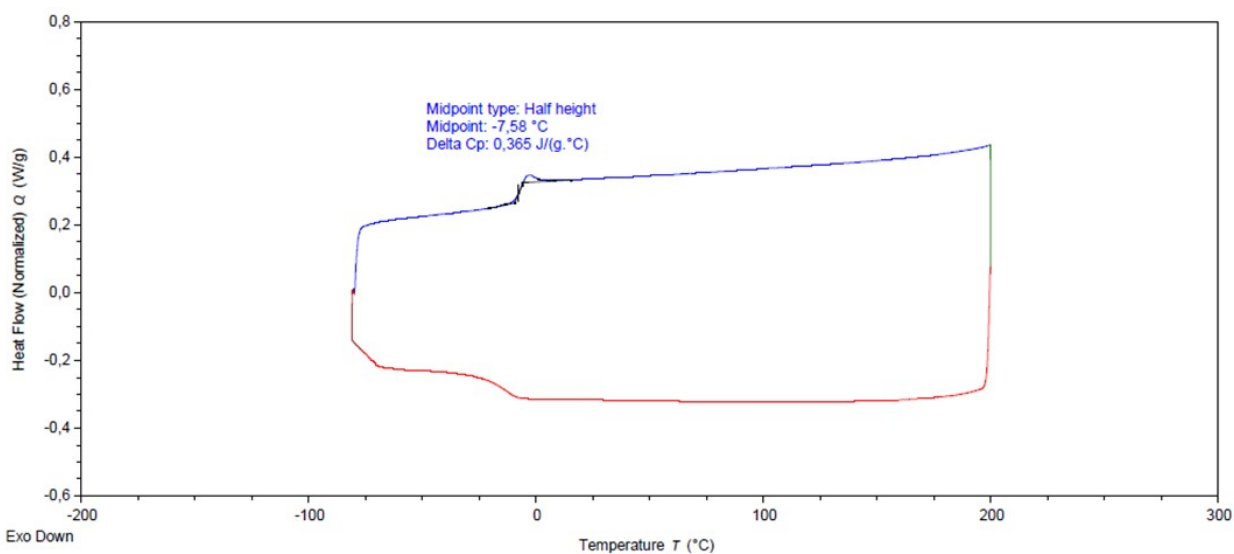

**Figure S17.** DSC thermogram (heating rate =  $10 \text{ }^\circ\text{C min}^{-1}$ , second heating cycle  $-80$  to  $+200 \text{ }^\circ\text{C}$ ) of a syndio-enriched PBPL<sup>CH<sub>2</sub>OCF<sub>2</sub>CHF<sub>2</sub></sup> ( $P_r = 0.79$ ) prepared by ROP of *rac*-BPL<sup>CH<sub>2</sub>OCF<sub>2</sub>CHF<sub>2</sub></sup> with the **1c**/*i*PrOH system (Table 1, entry 15).

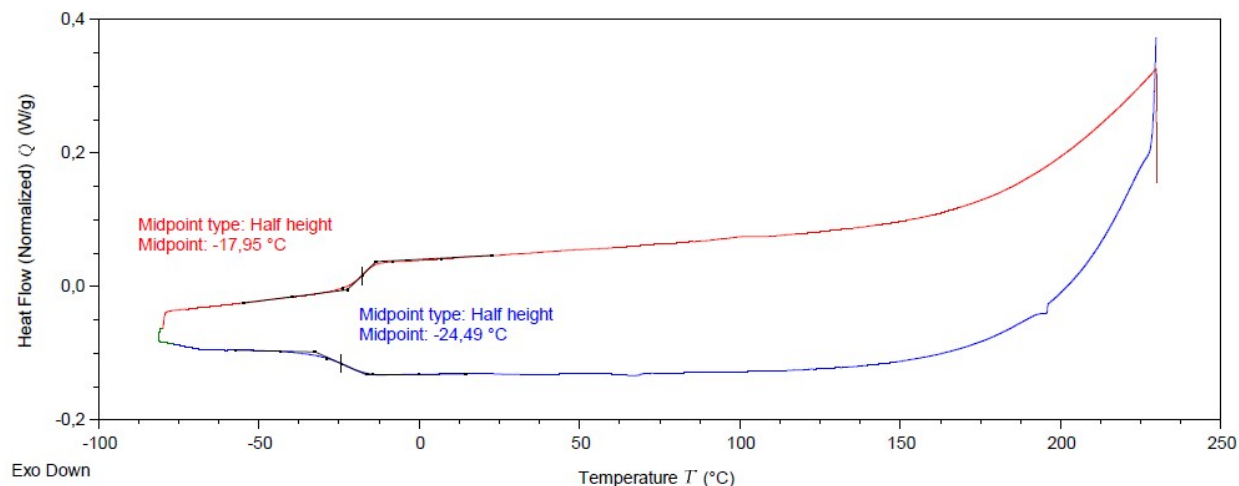

**Figure S18.** DSC thermogram (heating rate =  $10\text{ °C min}^{-1}$ , second heating cycle  $-80$  to  $+200\text{ °C}$ ) of a syndio-enriched PBPL<sup>CH<sub>2</sub>OCF<sub>2</sub>CHF<sub>2</sub></sup> ( $P_r = 0.86$ ) prepared by ROP of *rac*-BPL<sup>CH<sub>2</sub>OCF<sub>2</sub>CHF<sub>2</sub></sup> with the **1d**/*i*PrOH system (Table 1, entry 18).

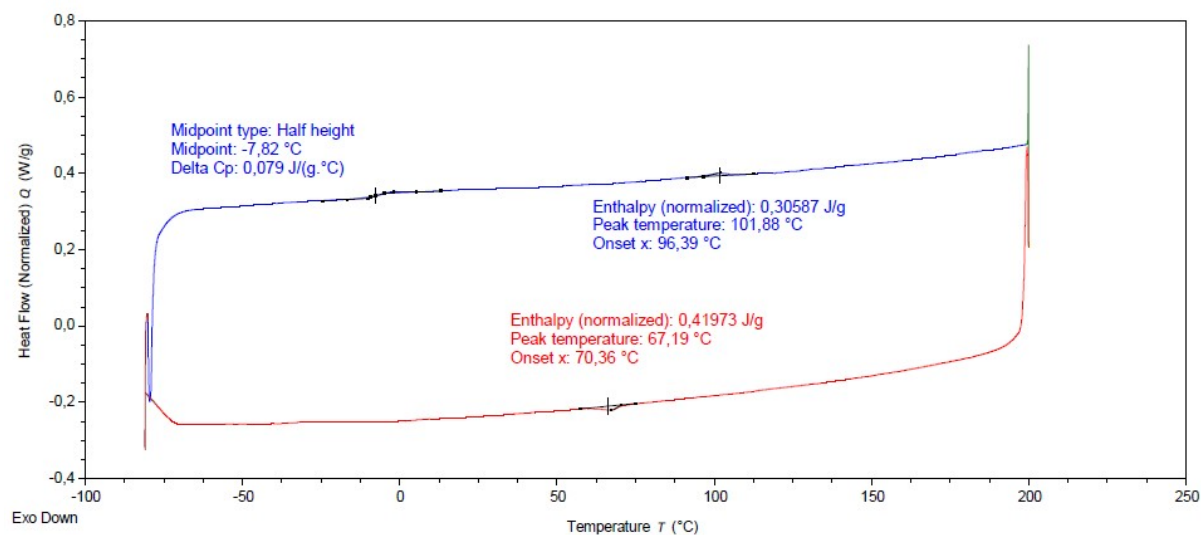

**Figure S19.** DSC thermogram (heating rate =  $10\text{ °C min}^{-1}$ , second heating cycle  $-80$  to  $+200\text{ °C}$ ) of an iso-enriched PBPL<sup>CH<sub>2</sub>OCF<sub>2</sub>CHF<sub>2</sub></sup> polymer ( $P_r = 0.09$ ) prepared by ROP of (*S*)-BPL<sup>CH<sub>2</sub>OCF<sub>2</sub>CHF<sub>2</sub></sup> mediated by the **1d**/*i*PrOH system (Table 1, entry 2).

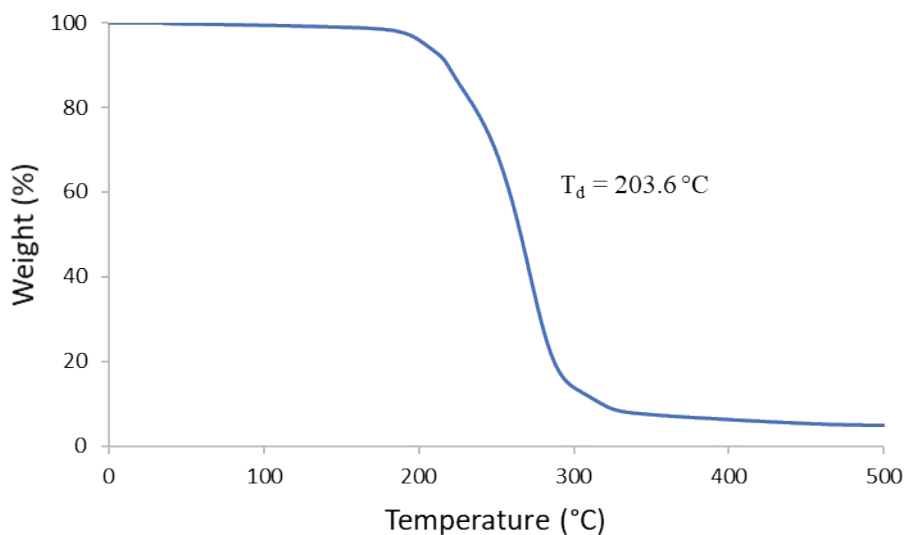

**Figure S20.** TGA thermogram of a PBPL<sup>CH<sub>2</sub>OCF<sub>2</sub>CHF<sub>2</sub></sup> prepared from the ROP of (*rac*)-BPL<sup>CH<sub>2</sub>OCF<sub>2</sub>CHF<sub>2</sub></sup> mediated by complex **1d** in the presence of *i*PrOH (Table 1, entry 5).  $T_d$  is the degradation temperature at 5wt% loss of the polymer.

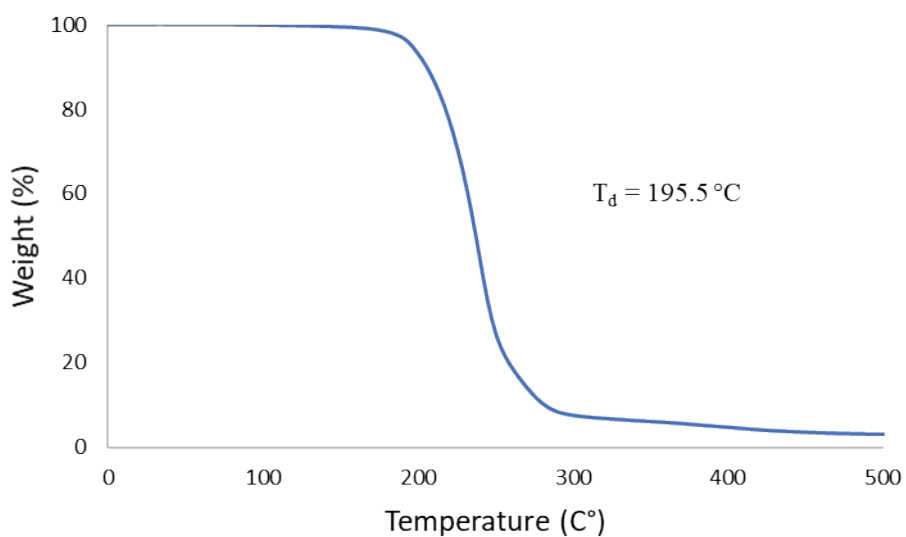

**Figure S21.** TGA thermogram of a PBPL<sup>CH<sub>2</sub>OCF<sub>2</sub>CHF<sub>2</sub></sup> prepared from the ROP of (*S*)-BPL<sup>CH<sub>2</sub>OCF<sub>2</sub>CHF<sub>2</sub></sup> mediated by complex **1d** in the presence of *i*PrOH (Table 1, entry 2).  $T_d$  is the degradation temperature at 5wt% loss of the polymer.

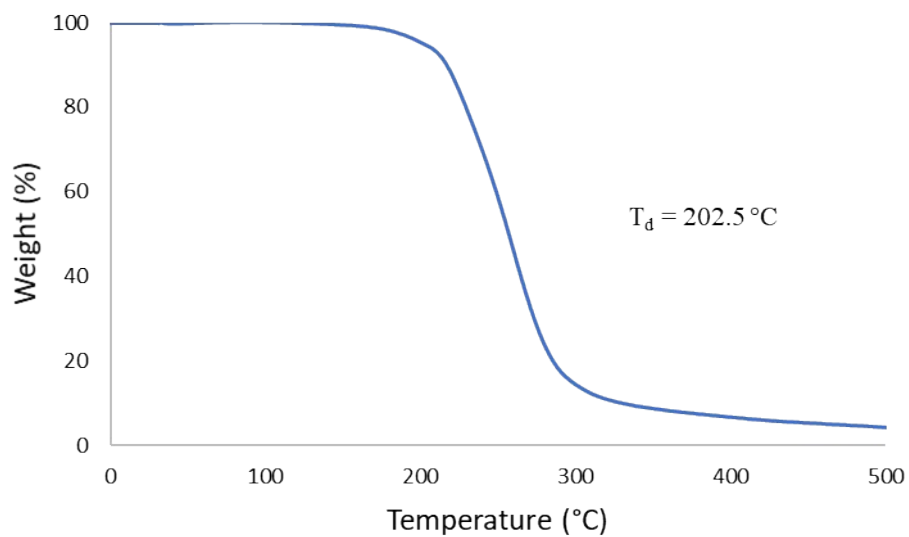

**Figure S22.** TGA thermogram of a PBPL<sup>CH<sub>2</sub>OCF<sub>2</sub>CHF<sub>2</sub></sup> prepared from the ROP of (*rac*)-BPL<sup>CH<sub>2</sub>OCF<sub>2</sub>CHF<sub>2</sub></sup> mediated by complex **1d** in the presence of *i*PrOH (Table 1, entry 3).  $T_d$  is the degradation temperature at 5wt% loss of the polymer.
